# Supplementary material for: MicroRNA miR-274-5p Controls Melanotic Mass Formation and Developmental Growth by Regulating the Found-in-Neurons-JNK Signaling Axis in Drosophila
Source: Preprints.org preprint supplement (doi:10.20944/preprints202306.0501.v1), 2023-06-07
Supplement: Supplementary file 1 [file supplementary]

## Sheet: Table S1
	Supplementary Table S1. Sequences of the oligoncleotides used in this study
	Name	Sequence (5' to 3')
	Dm-miR-274 overexpression-F	AAAGATATCGTGCATCCGTCTCGTGATTC
	Dm-miR-274 overexpression-R	AAACTCGAGATTGACAGCACACTTTCTTAGC
	miR-RT-adaptor	AGGCAGTGGTATCAACGCAGAGTACTTTTTTTTTTTTTTTTTTTTTTTTTTTTTTTTVN
	Universal-R	AGGCAGTGGTATCAACGCAG
	Dm_U6 snRNA-F	CAAAATCGTGAAGCGTTCCA
	Dm-mir-274-5p-F	TTTGTGACCGACACTAACGGGTA
	Dm_rp49-F	CTGCCCACCGGATTCAAG
	Dm_rp49-R	CGATCTCGCCGCAGTAAAC
	upd3-F	ACTGGGAGAACACCTGCAAT
	upd3-R	GCCCGTTTGGTTCTGTAGAT
	socs36e-F	CAGTCAGCAATATGTTGTCG
	socs36e-R	ACTTGCAGCATCGTCGCTTC
	fne-mRNA-level-F	GAGTCGACGCGAAAGAAAGT
	fne-mRNA-level-R	GCGAGACGAAATCGAAAAAG
	fne_3UTR_F	AAAACTCGAGCAAAATAACCGCCGCAAC
	fne_3UTR_R	AAAGCGGCCGCGATTTTCGGGTGTAGCTTCG
	fne_3UTR_mt_F	GCCACATCTTCATATTGCTAAGCTTAATGACACACGCGCCTGCGCAGCAGC
	fne_3UTR_mt_R	GCTGCTGCGCAGGCGCGTGTGTCATTAAGCTTAGCAATATGAAGATGTGGC
	fne_extension1_F	ACGAAACGAAAATCGAAGATATAGC
	fne_extension1_R	GAGTGTGTGTGTTTGGGTGCTT
	fne_extension2_F	TCGATAAAACGTGCGACAGATT
	fne_extension2_R	TGGCATTCTAACGCTCTTTGG
	Itgbn_F	CTCGCCGGCAACTACTTAAC
	Itgbn_R	GGACAGCCTGATCACTGGTT
	nfne_F	CGCCAACAATCCGAGCAATA
	nfne_R	AGTCATGGCATTTCCCGGTA
